# Supplementary material for: Consensus statement from the 2014 International Microdialysis Forum
Source: Springer Nature journal article supplement (doi:10.1007/s00134-015-3930-y), 2015-07-20
Supplement: MOESM1 [file 8124404]

## **SUPPLEMENTARY MATERIAL**

### **Microdialysis Methodology**

The clinical microdialysis catheter is carefully placed within the cerebral parenchyma either via a cranial access device (“bolt”) or tunnelled via a twist drill hole or placed under direct vision at craniotomy. The catheter consists of two concentric tubes. The outer tube is connected to a syringe pump that delivers perfusion fluid. This flows through the outer tube down to the tip, where the final 10 mm (typically) of the wall of the tube is made of a semi-permeable dialysis membrane, across which diffusion of molecules takes place bi-directionally between the perfused fluid and the brain interstitial fluid outside the catheter, depending on the current chemical gradient across the dialysis membrane (i.e. the chemical composition of the perfused fluid in relation to the interstitial fluid). The outer tube has a blind end (with a gold tip that is visible on a CT/MRI scan), and the perfusion fluid, now termed microdialysate, returns up the inner tube to be analyzed, typically by collection in a vial changed hourly. The microdialysate thus contains molecules that have diffused into the catheter from the brain interstitial fluid. A schematic diagram of the microdialysis catheter tip is shown in Supplementary Fig. 1.

The concentration of a substance measured in the dialysate is related to the free concentration in the tissue interstitial fluid by the mean relative recovery (the dialysate concentration as a percentage of the true interstitial concentration). This reflects properties of the catheter and perfusion fluid as well as properties of the tissue. Ratios of concentrations are independent of changes in relative recovery and depend less on tissue properties. The best pairings are substances whose concentrations are likely to change in opposite fashions (i.e. one increases while the other decreases) such as the lactate/pyruvate ratio (LP ratio) [1-3].

Perfusion fluid is pumped continuously through the microdialysis catheter, which means that equilibrium across the semi-permeable membrane is never reached. The slower the fluid flows through the catheter, the closer the concentration of the substance measured in the dialysate is to its concentration in the interstitial fluid. Typically, a 10 mm length membrane and a flow rate of 0.3  $\mu\text{L}/\text{min}$  is used to monitor the human brain. This equates to a mean relative recovery of approximately 65 to 72 % for the molecules typically measured in the clinical setting [4]. At faster flow rates, recovery declines; at 1  $\mu\text{L}/\text{min}$  recovery is between 21 and 34 % for the same molecules [4] although other substances such as neurotransmitters maintain high recovery at faster flow rates. Important tissue properties that can influence the mean relative recovery include tissue edema and tissue damage close to the catheter membrane both of which reduce availability of a substance near the catheter. An unexplored factor is the influence of ICP on relative recovery. Hence, microdialysate values should be presented as the measured concentration, unadjusted for relative recovery determined *in vitro*, and with details of the catheter and perfusion fluid (see core data reporting recommendations).

The choice of perfusion fluid influences the microenvironment and concentration of molecules recovered. Perfusion fluid used commercially for routine clinical monitoring of the brain is an un-buffered solution with an ionic composition similar to that of interstitial fluid. This ensures that there is no significant shift of hydrogen ions, the major cations (sodium, potassium and calcium) or anions (chloride) across the microdialysis membrane. In addition, magnesium (a predominantly intracellular cation) is added to ensure that NMDA glutamate channels do not become activated as a result of magnesium depletion. The influence of changes in the ionic composition on the recovery of molecules is in practice small in the human brain [4].

The bedside analyzers used for measuring the standard metabolites glucose, pyruvate, lactate, glutamate and glycerol are automated enzymatic colorimetric analyzers that are

designed to handle small sample volumes. The only current commercially available clinical microdialysis analyzer is the ISCUSflex (from M Dialysis AB, Stockholm, Sweden); earlier models (ISCUS and CMA600) from the same manufacturer are still in use. Each measurement uses between 0.2 and 1  $\mu\text{L}$  of the sample for analysis depending on the analyte. The leftover microdialysates in the collection vials can then be stored for later off-line analysis of other substances e.g. other amino acids, biomarkers, and drugs (although for drug pharmacokinetic studies it is recommended that in vivo recovery is estimated at the time of sampling). It is recommended to run control samples regularly (at a minimum of two concentration levels) as a complement to the automatic calibrations to ensure proper quality control of the analyser.

### Supplementary Figure 1

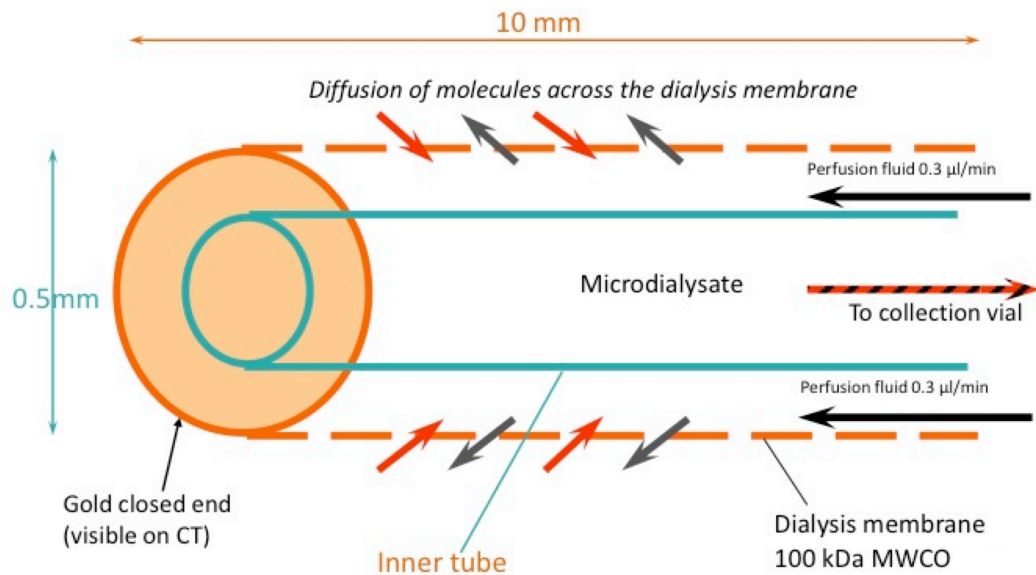

Figure originally published by Shannon RJ et al. in *Journal of Pharmacokinetics and Pharmacodynamics* 40:343–358 under a Creative Commons Attribution Licence [5].

## REFERENCES

1. Persson L, Hillered L (1996) Intracerebral Microdialysis. *J Neurosurg* 85:984–985. doi: 10.3171/jns.1996.85.5.0984
2. Reinstrup P, Ståhl N, Mellergård P, et al. (2000) Intracerebral microdialysis in clinical practice: baseline values for chemical markers during wakefulness, anesthesia, and neurosurgery. *Neurosurgery* 47:701–710. doi: 10.1227/00006123-200009000-00035
3. Parkin MC, Hopwood SE, Boutelle MG, Strong AJ (2003) Resolving dynamic changes in brain metabolism using biosensors and on-line microdialysis. *TrAC Trends in Analytical Chemistry* 22:487–497. doi: 10.1016/S0165-9936(03)00912-9
4. Hutchinson PJ, O'Connell MT, Al-Rawi PG, et al. (2000) Clinical cerebral microdialysis: a methodological study. *J Neurosurg* 93:37–43. doi: 10.3171/jns.2000.93.1.0037
5. Shannon RJ, Carpenter KLH, Guilfoyle MR, et al. (2013) Cerebral microdialysis in clinical studies of drugs: pharmacokinetic applications. *J Pharmacokinet Pharmacodyn* 40:343–358. doi: 10.1007/s10928-013-9306-4

## APPENDIX 1

### A list of speakers and topics discussed at the International Microdialysis Forum

|                                                                                              |                            |
|----------------------------------------------------------------------------------------------|----------------------------|
| 'Normal' brain chemistry                                                                     | R Helbok                   |
| Glucose & hyperglycolysis                                                                    | D K Menon                  |
| Lactate/pyruvate ratio: ischaemia and/or mitochondrial dysfunction                           | C-H Nordström              |
| Lactate: fuel or waste                                                                       | M Oddo                     |
| Glycerol: disordered energy metabolism with cell membrane breakdown and/or oxidative stress? | L Hillered                 |
| Glutamate: a marker of excitotoxicity?                                                       | C Robertson                |
| Relationship between MD, tissue oxygen and other parameters                                  | K O'Phelan                 |
| Influence of catheter location                                                               | P Enblad                   |
| Data analysis and reporting                                                                  | J Classen and U Ungerstedt |
| Online microdialysis and sensors                                                             | M G Boutelle               |
| Microdialysis as a tool to explore the ionic profile of the brain extracellular space        | J Sahuquillo               |
| Drug development                                                                             | C Dahyot-Fizelier          |
| Pediatric applications                                                                       | C N Gallagher              |
| Monitoring of inflammation                                                                   | A Helmy                    |
| Serum vs. microdialysis biomarkers                                                           | B Bellander                |
| <sup>13</sup> C labelling studies                                                            | K L H Carpenter            |
| Relationship between microdialysis and clinical course in stroke and SAH                     | E Ronne-Engström           |
| Relationship between microdialysis and clinical course in TBI                                | J Perez Barcena            |
| Microdialysis-guided therapeutic interventions                                               | M Smith and N Stocchetti   |

## APPENDIX 2

### A list of all participants and conflicts of interest

| <b>Name</b>            | <b>Department</b>                                                                                                                               | <b>COI</b>                                                                     |
|------------------------|-------------------------------------------------------------------------------------------------------------------------------------------------|--------------------------------------------------------------------------------|
| Bo-Michael Bellander   | Division of Neurosurgery, Dept. of Clinical Neuroscience, Karolinska Institute, Stockholm, Sweden                                               | Travel grant received from CMA Microdialysis AB to attend an academic meeting. |
| Antonio Belli          | NIHR Surgical Reconstruction and Microbiology Research Centre, Queen Elizabeth Hospital Birmingham and University of Birmingham, Birmingham, UK | No conflict of interest.                                                       |
| Martyn G Boutelle      | Department of Bioengineering, Imperial College London, London UK                                                                                | No conflict of interest.                                                       |
| Keri LH Carpenter      | Division of Neurosurgery, Dept. of Clinical Neurosciences, University of Cambridge, Cambridge Biomedical Campus, Cambridge, UK                  | No conflict of interest.                                                       |
| T Adrian Carpenter     | Wolfson Brain Imaging Centre, Dept. of Clinical Neurosciences, University of Cambridge, Cambridge Biomedical Campus, Cambridge, UK              | No conflict of interest.                                                       |
| Jeff W Chen            | Department of Neurosurgery, Legacy Emanuel Medical Center, Portland, OR, USA                                                                    | No conflict of interest.                                                       |
| Jan Claassen           | Neurological Intensive Care Unit, Columbia University College of Physicians & Surgeons, New York, NY, USA                                       | No conflict of interest.                                                       |
| Jonathan P Coles       | Division of Anaesthesia, Dept. of Medicine, University of Cambridge, Cambridge Biomedical Campus, Cambridge, UK                                 | No conflict of interest.                                                       |
| Marek Czosnyka         | Division of Neurosurgery, Dept. of Clinical Neurosciences, University of Cambridge, Cambridge Biomedical Campus, Cambridge, UK                  | No conflict of interest.                                                       |
| Claire Dahyot-Fizelier | Neurological Intensive Care Unit, Division of Anaesthesia and Surgical Intensive Care, Inserm U1070, University Hospital of Poitiers, France.   | No conflict of interest.                                                       |

|          |            |                                                                                                                                  |                                                                                          |
|----------|------------|----------------------------------------------------------------------------------------------------------------------------------|------------------------------------------------------------------------------------------|
| Nil      | Dizdar     | Department of Neurology, University Hospital Linköping, Sweden                                                                   | Microdialysis catheters received from CMA Microdialysis AB for a research study in 2007. |
| Per      | Enblad     | Department of Neurosurgery, University Hospital Uppsala, Sweden                                                                  | No conflict of interest.                                                                 |
| Clare N  | Gallagher  | Division of Neurosurgery, Dept. of Clinical Neurosciences, University of Calgary, Alberta, Canada                                | No conflict of interest.                                                                 |
| J Clay   | Goodman    | Department of Pathology & Immunology, Baylor College of Medicine, Houston, TX, USA                                               | No conflict of interest.                                                                 |
| Arun K   | Gupta      | Division of Anaesthesia, Dept. of Medicine, University of Cambridge, Cambridge Biomedical Campus, Cambridge, UK                  | No conflict of interest.                                                                 |
| Raimund  | Helbok     | Neurocritical Care Unit, Department of Neurology, Innsbruck Medical University, Austria                                          | No conflict of interest.                                                                 |
| Adel     | Helmy      | Division of Neurosurgery, Dept. of Clinical Neurosciences, University of Cambridge, Cambridge Biomedical Campus, Cambridge, UK   | No conflict of interest.                                                                 |
| Lars     | Hillered   | Department of Neuroscience, Division of Neurosurgery, Uppsala University, Sweden                                                 | No conflict of interest.                                                                 |
| Peter JA | Hutchinson | Division of Neurosurgery, Dept. of Clinical Neurosciences, University of Cambridge, Cambridge Biomedical Campus, Cambridge, UK   | No conflict of interest.                                                                 |
| Ibrahim  | Jalloh     | Division of Neurosurgery, Dept. of Clinical Neurosciences, University of Cambridge, Cambridge Biomedical Campus, Cambridge, UK   | No conflict of interest.                                                                 |
| Peter D  | Le Roux    | The Brain and Spine Center, Suite 370, Medical Science Building, Lankenau Medical Center, 100 E. Lancaster Ave Wynnewood PA, USA | Previous research support received from CMA Microdialysis AB.                            |

|             |                  |                                                                                                                                                                     |                                                                                                  |
|-------------|------------------|---------------------------------------------------------------------------------------------------------------------------------------------------------------------|--------------------------------------------------------------------------------------------------|
| Sandra      | Magnoni          | Department of Anesthesiology and Intensive Care<br>Fondazione IRCCS Cà Granda-<br>Ospedale Maggiore Policlinico, Milan,<br>Italy                                    | No conflict of interest.                                                                         |
| Halinder S  | Mangat           | Departments of Neurology and<br>Neurosurgery, Division of Stroke &<br>Critical Care, Weill Cornell Medical<br>College, New York, NY, USA                            | Travel grant received from M Dialysis to<br>attend the International Microdialysis<br>Forum 2014 |
| Niklas      | Marklund         | Departments of Neuroscience and<br>Neurosurgery, Uppsala University,<br>Uppsala University Hospital, Uppsala,<br>Sweden.                                            | No conflict of interest.                                                                         |
| David K     | Menon            | Division of Anaesthesia, University of<br>Cambridge, Cambridge Biomedical<br>Campus, Cambridge, UK                                                                  | No conflict of interest.                                                                         |
| Ambroise    | Montcriol        | Intensive Care Unit, Sainte Anne<br>Military Teaching Hospital, Toulon,<br>France                                                                                   | No conflict of interest.                                                                         |
| Troels H    | Nielsen          | Department of Neurosurgery, Odense<br>University Hospital, Denmark                                                                                                  | Current research support from M<br>Dialysis.                                                     |
| Carl-Henrik | Nordström        | Department of Neurosurgery, Odense<br>University Hospital, Denmark                                                                                                  | No conflict of interest.                                                                         |
| Mark T      | O'Connell        | Probe Scientific Limited, Bedford<br>Technology Park, Thurleigh, Bedford,<br>UK                                                                                     | No conflict of interest.                                                                         |
| Kristine H  | O'Phelan         | Department of Neurology, Miller<br>School of Medicine, University of<br>Miami, Miami, USA                                                                           | No conflict of interest.                                                                         |
| Mauro       | Oddo             | Department of Intensive Care<br>Medicine, CHUV-University Hospital,<br>Faculty of Biology and Medicine,<br>University of Lausanne, CH-1011<br>Lausanne, Switzerland | No conflict of interest.                                                                         |
| Jon         | Perez<br>Barcena | Neurocritical Care Department,<br>Jackson Memorial Hospital, University<br>of Miami, Miami, USA                                                                     | No conflict of interest.                                                                         |



|           |                  |                                                                                                                                                                       |                                                                               |
|-----------|------------------|-----------------------------------------------------------------------------------------------------------------------------------------------------------------------|-------------------------------------------------------------------------------|
| Maria A   | Poca             | Department of Neurosurgery, Neurotrauma and Neurosurgery Research Unit, Vall d'Hebron University Hospital, Barcelona, Spain                                           | No conflict of interest.                                                      |
| Claudia   | Robertson        | Department of Neurosurgery, Baylor College of Medicine, Houston, TX, USA                                                                                              | No conflict of interest.                                                      |
| Elisabeth | Ronne-Engström   | Department of Neuroscience, Division of Neurosurgery, Uppsala University, Sweden                                                                                      | No conflict of interest.                                                      |
| Elham     | Rostami          | Department of Neuroscience, Division of Neurosurgery, Uppsala University, Sweden                                                                                      | No conflict of interest.                                                      |
| Juan      | Sahuquillo       | Department of Neurosurgery, Vall d'Hebron University Hospital, Universidad Autonoma de Barcelona, Barcelona, Spain                                                    | No conflict of interest.                                                      |
| Asita     | Sarrafzadeh      | Department of Neurosurgery, Heidelberg University Hospital Im Neuenheimer Feld 400 69120 Heidelberg Germany                                                           | No conflict of interest.                                                      |
| Richard J | Shannon          | Division of Neurosurgery, Dept. of Clinical Neurosciences, University of Cambridge, Cambridge Biomedical Campus, Cambridge, UK                                        | No conflict of interest.                                                      |
| Jane      | Skjøth-Rasmussen | Departments of Neurosurgery, Odense University Hospital, Odense, Denmark                                                                                              | Accepted invitation to attend a microdialysis course organised by M Dialysis. |
| Peter     | Smielewski       | Division of Neurosurgery, Dept. of Clinical Neurosciences, University of Cambridge, Cambridge Biomedical Campus, Cambridge, UK                                        | No conflict of interest.                                                      |
| Martin    | Smith            | Neurocritical Care Unit, The National Hospital for Neurology and Neurosurgery, UCLH/UCL National Institute for Health Research Biomedical Research Centre, London, UK | No conflict of interest.                                                      |

|           |            |                                                                                                                                    |                                                                            |
|-----------|------------|------------------------------------------------------------------------------------------------------------------------------------|----------------------------------------------------------------------------|
| Nino      | Stocchetti | Milan University, Terapia Intensiva Neuroscienze, Fondazione IRCCS Ca' Granda, Ospedale Maggiore Policlinico, Milan, Italy         | No conflict of interest.                                                   |
| John F    | Stover     | Fresenius Kabi, Bad Homburg, Germany / Surgical Intensive Care Medicine, University Hospital, Zurich, Switzerland                  | No conflict of interest.                                                   |
| Ivan      | Timofeev   | Division of Neurosurgery, Dept. of Clinical Neurosciences, University of Cambridge, Cambridge Biomedical Campus, Cambridge, UK     | No conflict of interest.                                                   |
| Urban     | Ungerstedt | Department of Physiology and Pharmacology, Karolinska Institute, Stockholm, Sweden                                                 | No conflict of interest.                                                   |
| Paul      | Vespa      | UCLA Brain Injury Research Center, David Geffen School of Medicine, University of California, Los Angeles, Los Angeles, California | No conflict of interest.                                                   |
| Elizabeth | Zavala     | Surgical ICU, Department of Anesthesiology. Clinic Hospital, IDIBAPS. Universidad de Barcelona, Barcelona, Spain                   | Technical and teaching support received from CMA Microdialysis AB in 2000. |
